# Supplementary material
Source: PubMed Central journal article supplement (PMC6242776)
Supplement: NIHMS957854-supplement-supplement_1.pdf [file NIHMS957854-supplement-supplement_1.pdf]

## **Appendix**

### **Supplement 1.**

#### **ICD-9 Diagnosis Codes for Depression:**

296.20-296.36, 298.0, 300.4, 309.1, 311

#### **ICD-9 Diagnosis Codes for Anxiety:**

293.84, 300.00-300.09, 300.10, 300.20-300.29, 300.3, 300.5, 300.89, 300.9, 308.0-308.9,  
309.81, 313.0-313.22, 313.3, 313.82, 313.83

### **Supplement 2. Antidepressants**

amitriptyline, bupropion, citalopram, clomipramine, desipramine, desvenlafaxine, doxepin,  
duloxetine, escitalopram, fluoxetine, fluvoxamine, hydroxytryptophan, imipramine,  
isocarboxazid, levomilnacipran, mirtazapine, nefazodone, nortriptyline, paroxetine, phenelzine,  
protriptyline, selegiline, sertraline, tranylcypromine, trazodone, trimipramine, venlafaxine,  
vilazodone, vortioxetine

### **Supplement 3. Anxiolytics**

alprazolam, buspirone, chloral hydrate, chlordiazepoxide, clonazepam, clorazepate, diazepam,  
dichloralphenazone, estazolam, eszopiclone, flurazepam, lorazepam, melatonin, meprobamate,  
midazolam, oxazepam, phenobarbital, quazepam, ramelteon, secobarbital, temazepam,  
triazolam, zaleplon, zolpidem
